# Supplementary material for: Hydrophobic Mesoporous Silica-Coated Solid-Phase Microextraction Arrow System for the Determination of Six Biogenic Amines in Pork and Fish
Source: MDPI journal article supplement (doi:10.3390/foods12030578), 2023-01-28
Supplement: s1 [file s1]

## Electric Supplementary Material

# Hydrophobic Mesoporous Silica-Coated Solid Phase Microextraction Arrow System for the Determination of Six Biogenic Amines in Pork and Fish

**Mengfei Chen, Hangzhen Lan \*, Daodong Pan and Tao Zhang**

State Key Laboratory for Quality and Safety of Agro-products, Key Laboratory of Animal Protein Deep Processing Technology of Zhejiang Province, Zhejiang-Malaysia Joint Research Laboratory for Agricultural Product Processing and Nutrition and College of Food and Pharmaceutical Sciences, Ningbo University, Ningbo 315800, China

\* Correspondence: lanhangzhen@nbu.edu.cn

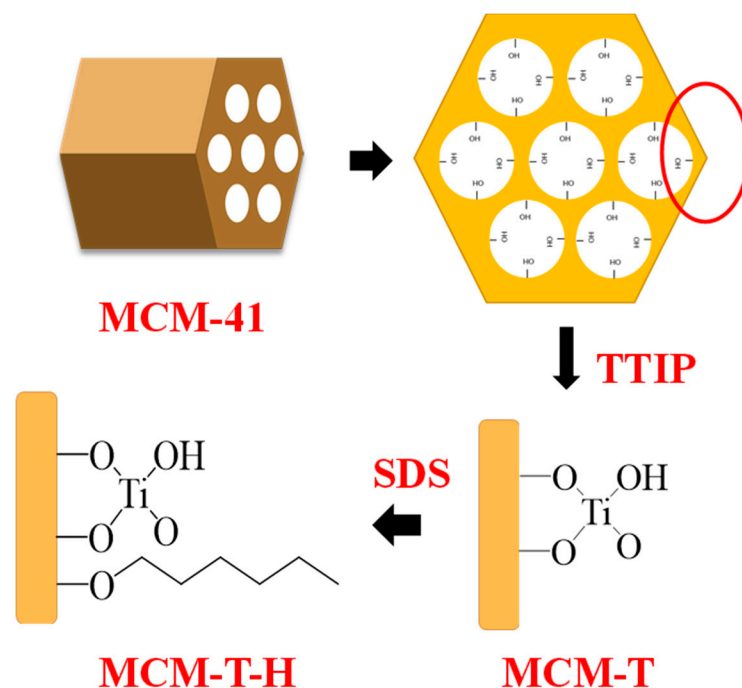

**Figure S1.** Synthesis route of MCM-T-H.

**Citation:** Chen, M.; Lan, H.; Pan, D.; Zhang, T. Hydrophobic Mesoporous Silica-Coated Solid-Phase Microextraction Arrow System for the Determination of Six Biogenic Amines in Pork and Fish. *Foods* **2023**, *12*, 578. <https://doi.org/10.3390/foods12030578>

Academic Editors: Marco Beccaria  
and Chiara De Luca

Received: 24 December 2022

Revised: 18 January 2023

Accepted: 20 January 2023

Published: 28 January 2023

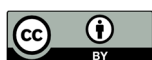

**Copyright:** © 2023 by the authors. Licensee MDPI, Basel, Switzerland. This article is an open access article distributed under the terms and conditions of the Creative Commons Attribution (CC BY) license (<https://creativecommons.org/licenses/by/4.0/>).

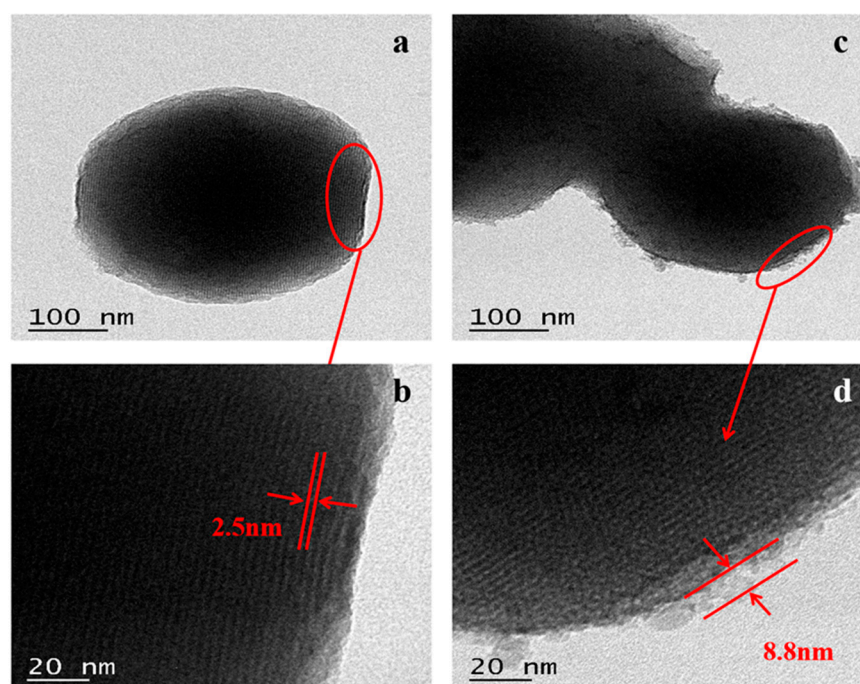

**Figure S2.** TEM images of (a) MCM-41; (b) MCM-41; (c) MCM-T-H; and (d) MCM-T-H.

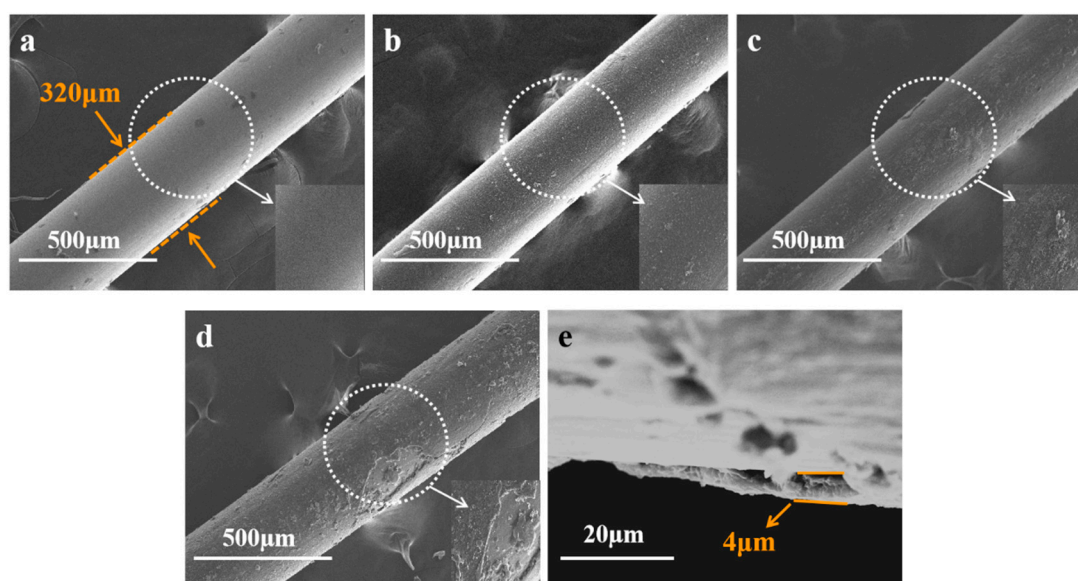

**Figure S3.** (a) Bare SPME Arrow; (b) SPME Arrow coated with MCM-T-H; (c) MCM-T-H-SPME Arrow used 10 times; (d) MCM-T-H-SPME Arrow used 50 times; and (e) coating thickness.

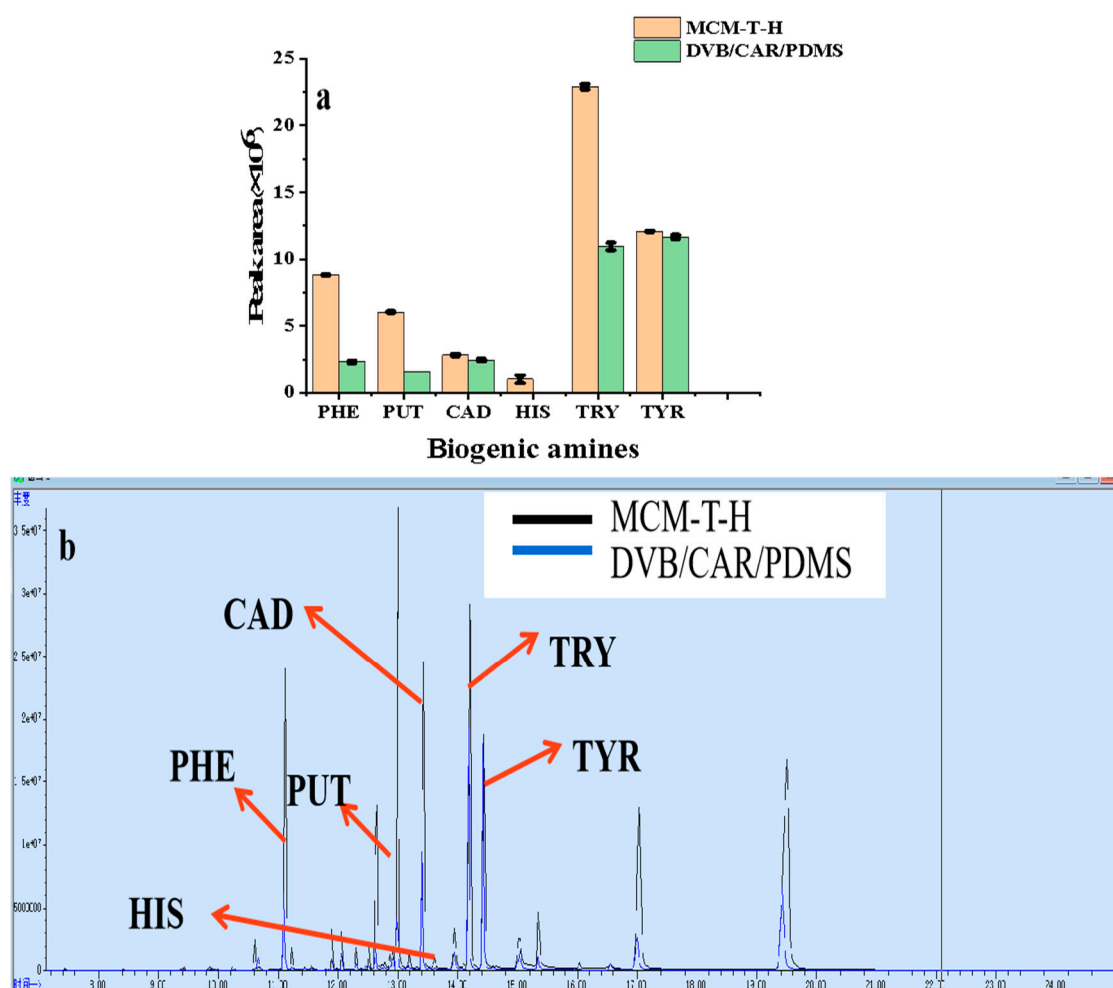

**Figure S4.** Comparison of extraction efficiency between MCM-T-H and DVB/CAR/PDMS-coated SPME Arrows.

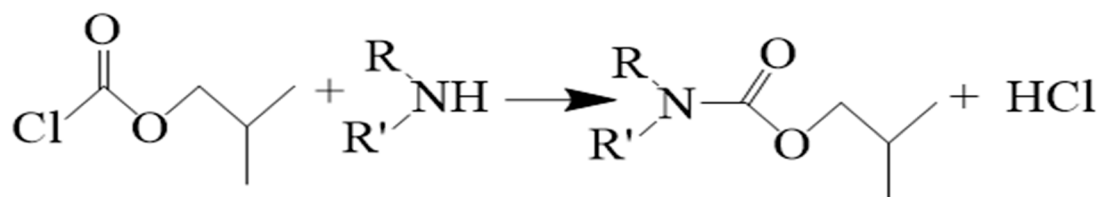

**Figure S5.** Schematic representation of the derivatization of BAs with isobutyl chloroformate.

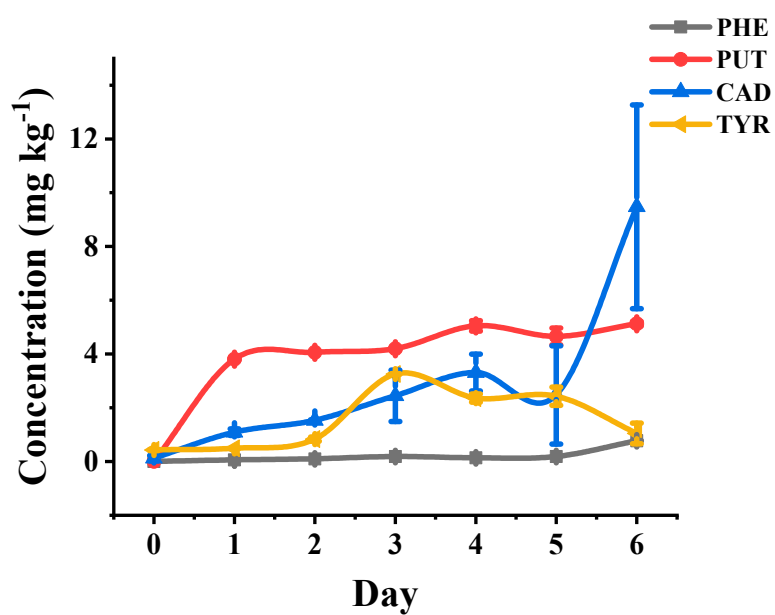

Figure S6. Variations of the biogenic amines content in pork over 7 days.

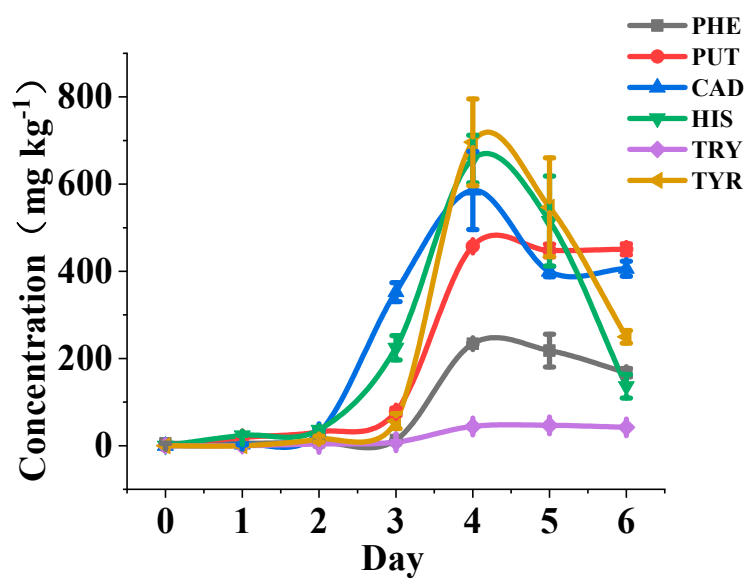

Figure S7. Variations of the biogenic amines content in mackerel over 7 days.

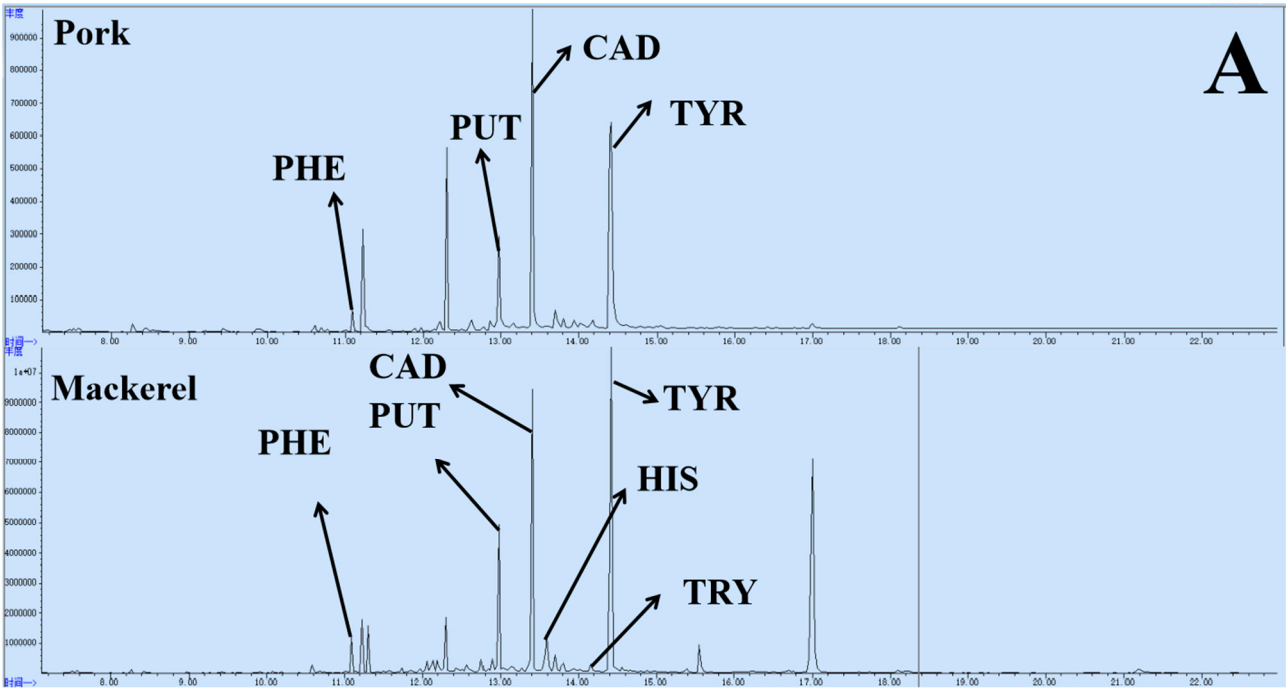

(A)

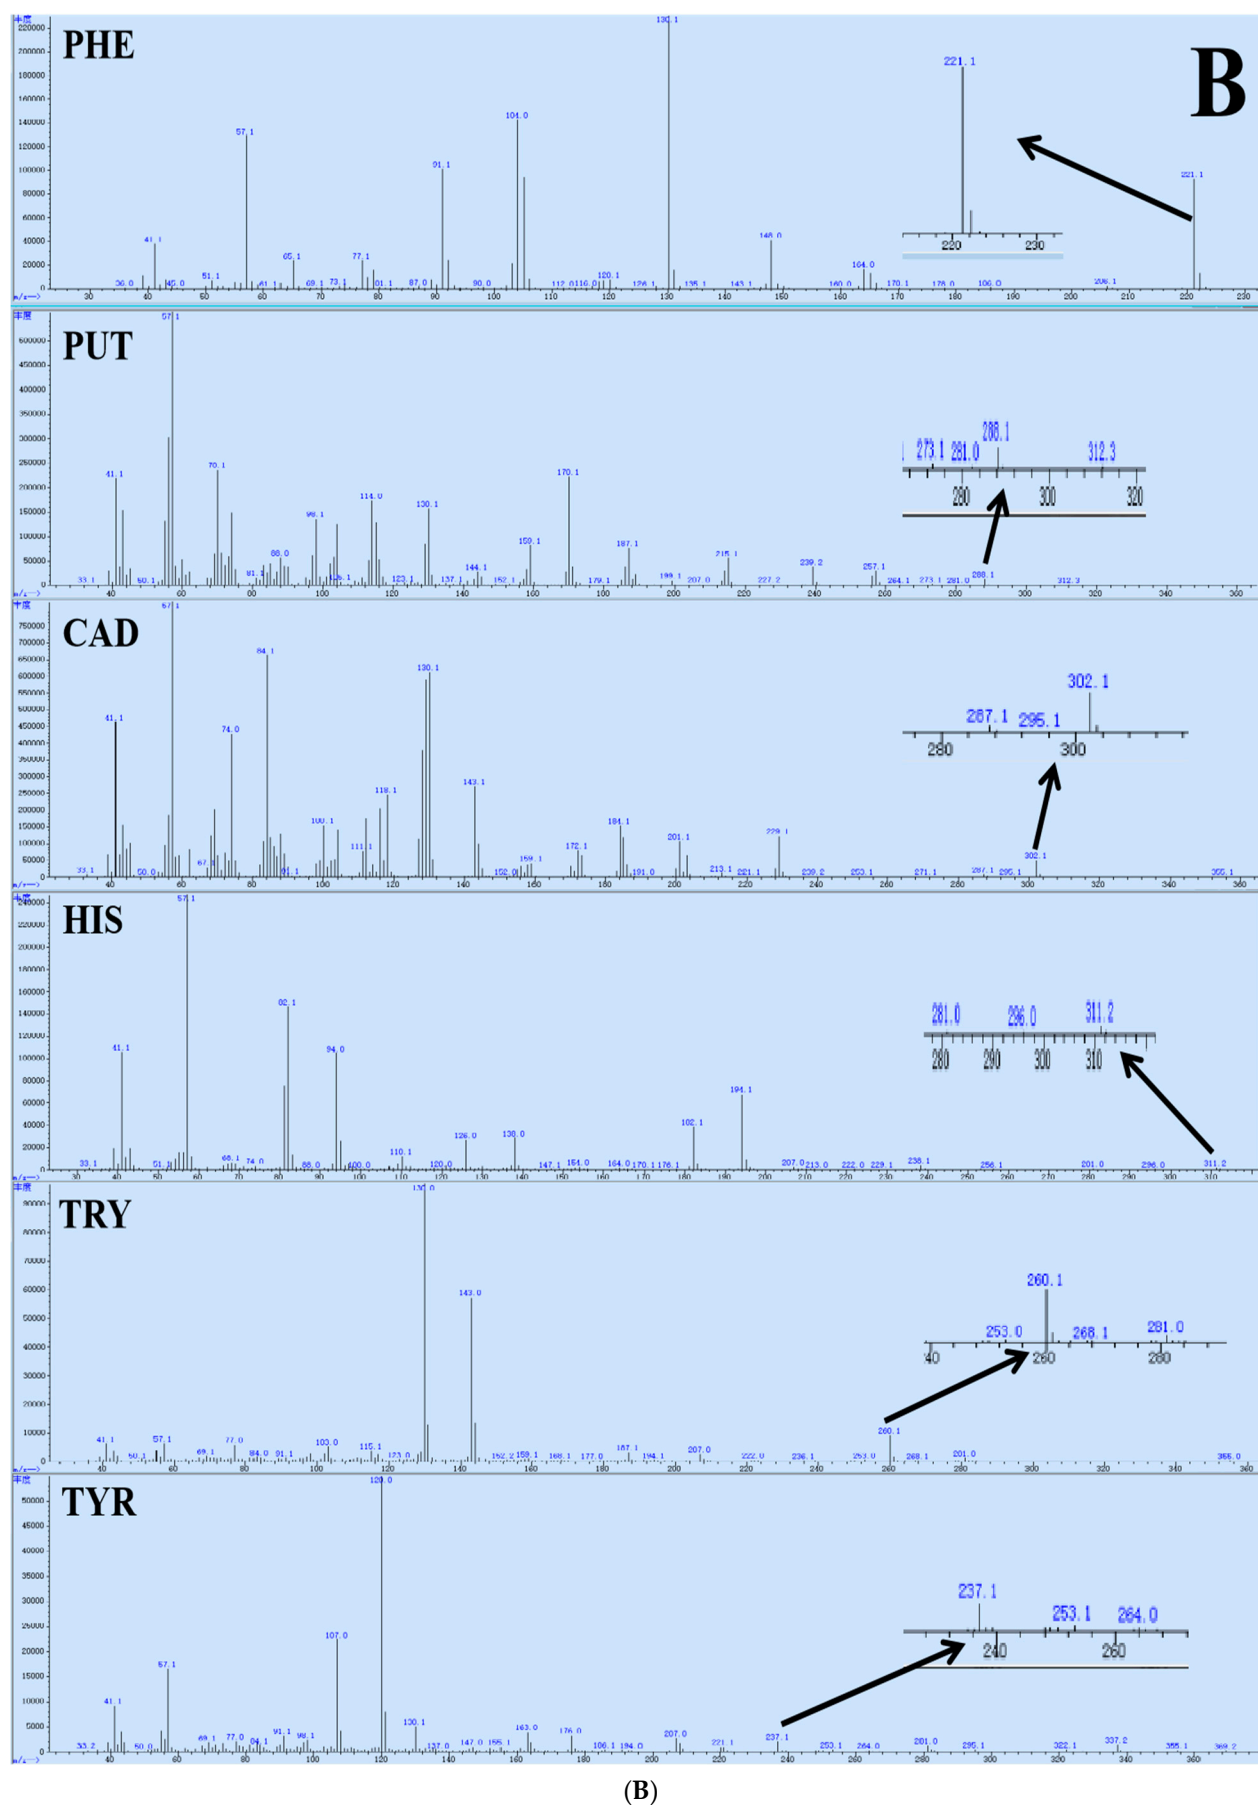

Figure S8. GC chromatograms (A) and mass spectrums (B) of pork and mackerel.

**Table S1.** Textural properties of MCM-41 series materials.

|         | BET Surface Area<br>(m <sup>2</sup> g <sup>-1</sup> ) | Pore Diameter<br>(nm) | Total Pore Volume<br>(cm <sup>3</sup> g <sup>-1</sup> ) |
|---------|-------------------------------------------------------|-----------------------|---------------------------------------------------------|
| MCM-41  | 893.3                                                 | 2.37                  | 0.73                                                    |
| MCM-T   | 587.4                                                 | 2.22                  | 0.50                                                    |
| MCM-T-H | 604.5                                                 | 1.87                  | 0.47                                                    |

**Table S2.** Fragments, retention times, and structural formulas for the procedure of determination of BAs based on the application of the GC-MS technique.

| Analytes | <i>m/z</i> | Retention Time (min) | Chemical Structure                                                                  | Derivatized Products                                                                 |
|----------|------------|----------------------|-------------------------------------------------------------------------------------|--------------------------------------------------------------------------------------|
| PHE      | 221        | 11.14                | 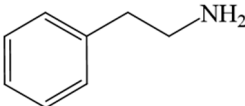   |    |
| PUT      | 288        | 13.02                |    |    |
| CAD      | 302        | 13.46                |    |    |
| HIS      | 311        | 13.64                |  |  |
| TRY      | 260        | 14.32                |  |  |
| TYR      | 237        | 14.51                |  |  |
